# Supplementary material for: Fate of methane in canals draining tropical peatlands
Source: PubMed Central journal article supplement (PMC11555057; doi:10.1038/s41467-024-54063-x), 2024-11-11
Supplement: 41467_2024_54063_MOESM2_ESM.pdf [file 41467_2024_54063_MOESM2_ESM.pdf]

## **Description of Additional Supplementary Files**

File Name: Supplementary Data 1

Description: Overview of data collected at 34 canal sampling sites in West Kalimantan, Indonesia.

File Name: Supplementary Data 2

Description: Peat porewater CH<sub>4</sub> concentration and  $\delta^{13}\text{C}$ -CH<sub>4</sub> measurements from 6 profiles collected adjacent to a subset of studied drainage canals.
